# Supplementary material
Source: PubMed Central journal article supplement (PMC4036582)
Supplement: supp_tpc.113.122358_tpc122358SupplementalML.pdf [file supp_tpc.113.122358_tpc122358SupplementalML.pdf]

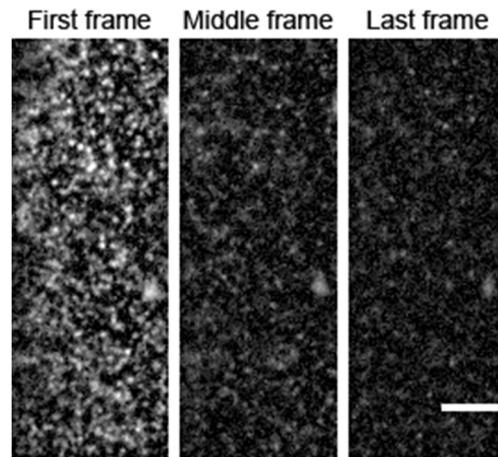

**Supplemental Movie 1.** The Movie of Dynamics of GFP-RbohD Foci under Normal Condition ( $13 \times 36 \mu\text{m}$ ). This movie consists of 100 VA-TIRFM images acquired at 235 ms interval. The total acquisition period is 23.5 s. Bar =  $5 \mu\text{m}$ .

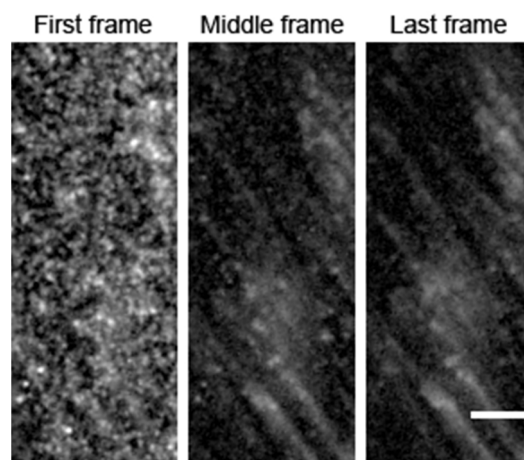

**Supplemental Movie 2.** The Movie of Dynamics of GFP-RbohD Foci Treated with DPI ( $15 \times 38 \mu\text{m}$ ). This movie consists of 100 VA-TIRFM images acquired at 235 ms interval. The total acquisition period is 23.5 s. Bar =  $5 \mu\text{m}$ .

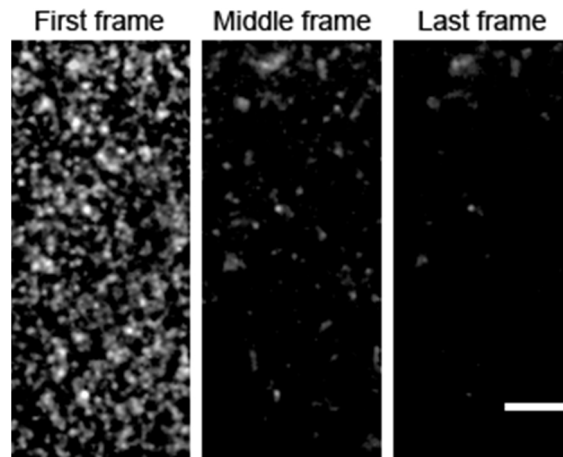

**Supplemental Movie 3.** The Movie of Dynamics of GFP-RbohD Foci Treated with Ionomycin ( $15 \times 34 \mu\text{m}$ ). This movie consists of 100 VA-TIRFM images acquired at 235 ms interval. The total acquisition period is 23.5 s. Bar =  $5 \mu\text{m}$ .

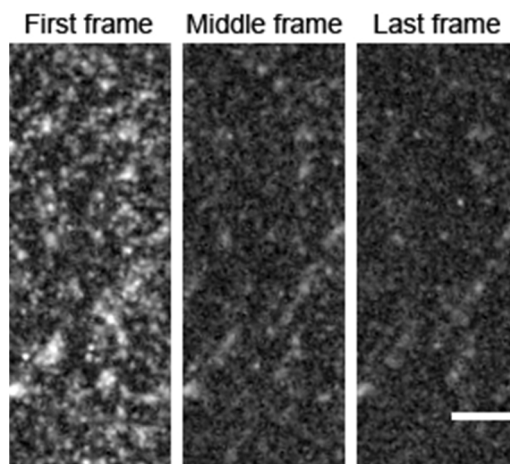

**Supplemental Movie 4.** The Movie of Dynamics of GFP-RbohD Foci Treated with Calyculin A ( $13 \times 35 \mu\text{m}$ ). This movie consists of 100 VA-TIRFM images acquired at 235 ms interval. The total acquisition period is 23.5 s. Bar =  $5 \mu\text{m}$ .

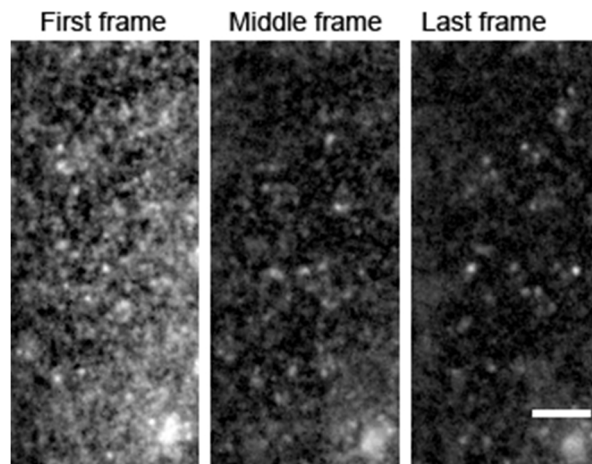

**Supplemental Movie 5.** The Movie of Dynamics of GFP-RbohD Foci Treated with ABA ( $16 \times 35 \mu\text{m}$ ). This movie consists of 100 VA-TIRFM images acquired at 235 ms interval. The total acquisition period is 23.5 s. Bar =  $5 \mu\text{m}$ .

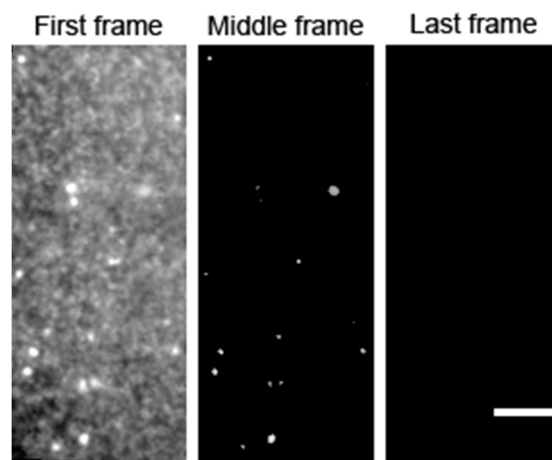

**Supplemental Movie 6.** The Movie of Dynamics of GFP-RbohD Foci Treated with Flg22 ( $15 \times 35 \mu\text{m}$ ). This movie consists of 100 VA-TIRFM images acquired at 235 ms interval. The total acquisition period is 23.5 s. Bar =  $5 \mu\text{m}$ .

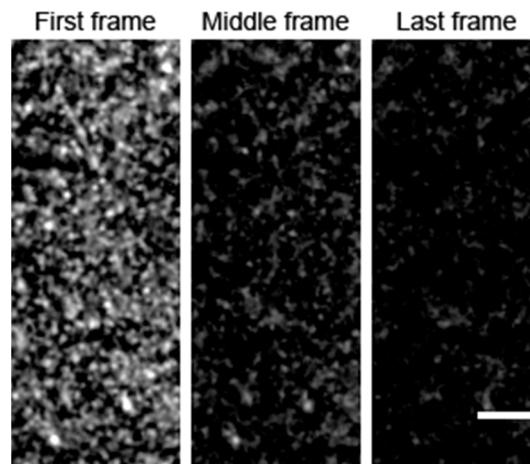

**Supplemental Movie 7.** The Movie of Dynamics of GFP-RbohD Foci Treated with TyrA23 ( $15 \times 37 \mu\text{m}$ ). This movie consists of 100 VA-TIRFM images acquired at 235 ms interval. The total acquisition period is 23.5 s. Bar =  $5 \mu\text{m}$ .

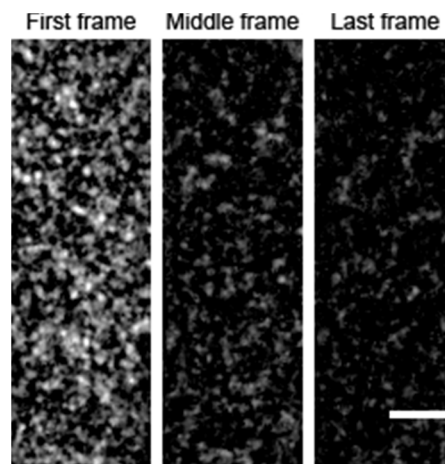

**Supplemental Movie 8.** The Movie of Dynamics of GFP-RbohD Foci Treated with M $\beta$ CD ( $12 \times 36 \mu\text{m}$ ). This movie consists of 100 VA-TIRFM images acquired at 235 ms interval. The total acquisition period is 23.5 s. Bar =  $5 \mu\text{m}$ .

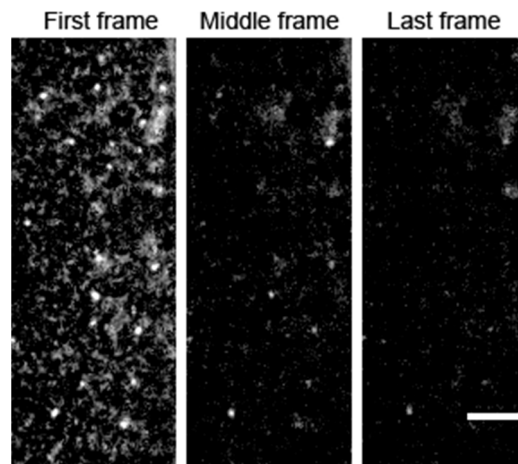

**Supplemental Movie 9.** The Movie of Dynamics of GFP-RbohD Foci in the Presence of NaCl ( $15 \times 40 \mu\text{m}$ ). This movie consists of 100 VA-TIRFM images acquired at 235 ms interval. The total acquisition period is 23.5 s. Bar =  $5 \mu\text{m}$ .

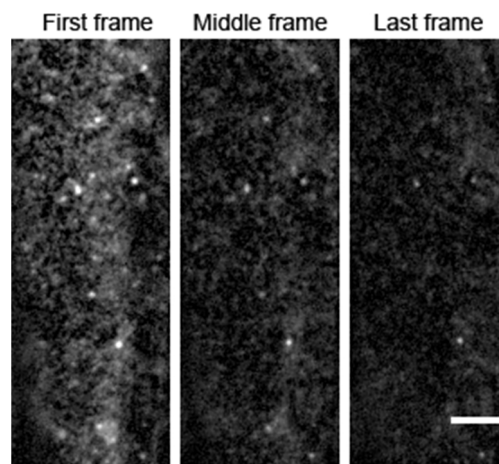

**Supplemental Movie 10.** The Movie of Dynamics of GFP-RbohD Foci Treated with TyrA23 in the Presence of NaCl ( $15 \times 38 \mu\text{m}$ ). This movie consists of 100 VA-TIRFM images acquired at 235 ms interval. The total acquisition period is 23.5 s. Bar =  $5 \mu\text{m}$ .

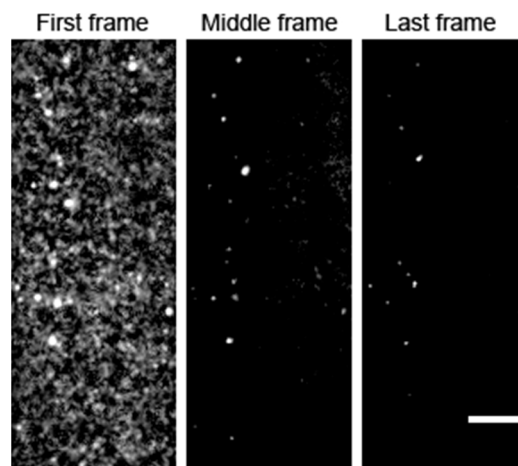

**Supplemental Movie 11.** The Movie of Dynamics of GFP-RbohD Foci Treated with M $\beta$ CD in the Presence of NaCl ( $16 \times 40 \mu\text{m}$ ). This movie consists of 100 VA-TIRFM images acquired at 235 ms interval. The total acquisition period is 23.5 s. Bar =  $5 \mu\text{m}$ .
